# Supplementary material for: Milk Fat Globule-Epidermal Growth Factor-Factor 8 Reverses Lipopolysaccharide-Induced Microglial Oxidative Stress
Source: Hindawi journal article supplement (doi:10.1155/2019/2601394), 2019-03-13
Supplement: f1 [file 2601394.f1.pdf]

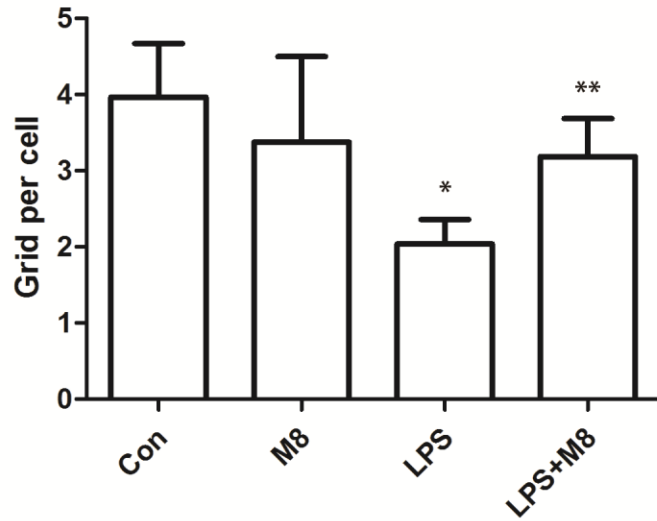

(a)

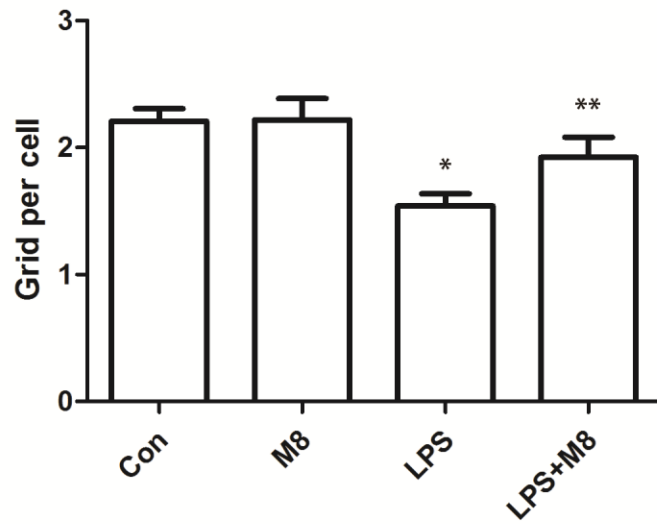

(b)

SUPPLEMENTAL FIGURE 1. Grid cross analysis of microglia morphology in animals (a) and primary microglia (b). Data were expressed as mean  $\pm$  SD (*in vivo*, n = 10; *in vitro*, n = 3). \*  $P < 0.05$ , versus Control group; \*\*  $P < 0.05$ , versus LPS group. Con, Control; M8, MFG-E8.
